# Supplementary material for: The promise of CD4+FoxP3+ regulatory T-cell manipulation in vivo: applications for allogeneic hematopoietic stem cell transplantation
Source: PubMed Central journal article supplement — Haematologica. 2019 Jun 20;104(7):1309–21. doi: 10.3324/haematol.2018.198838 (PMC6601084; doi:10.3324/haematol.2018.198838), 2019-07
Supplement: 2018.198838.COPSEL_SUPPL.pdf [file 2018.198838.COPSEL_SUPPL.pdf]

# The promise of CD4<sup>+</sup>FoxP3<sup>+</sup> regulatory T-cell manipulation *in vivo*: applications for allogeneic hematopoietic stem cell transplantation

Sabrina Copsel,<sup>1\*</sup> Dietlinde Wolf,<sup>2\*</sup> Krishna V. Komanduri<sup>1,2,3</sup> and Robert B. Levy<sup>1,3,4</sup>

<sup>1</sup>Department of Microbiology and Immunology; <sup>2</sup>Sylvester Comprehensive Cancer Center; <sup>3</sup>Division of Transplantation and Cellular Therapy, Department of Medicine and <sup>4</sup>Department of Ophthalmology, Miller School of Medicine, University of Miami, FL, USA

*\*SC and DW contributed equally to this work.*

©2019 Ferrata Storti Foundation. This is an open-access paper. doi:10.3324/haematol.2018.198838

Received: February 4, 2019.

Accepted: May 7, 2019.

Pre-published: June 20, 2019.

Correspondence: ROBERT B. LEVY - rlevy@med.miami.edu

---

**Supplemental Table 1. Clinical trials using IL-2 in GVHD.** Trials listed at [www.clinicaltrials.gov](http://www.clinicaltrials.gov).

|   | Title                                                                                                            | Identifier  | Status                 | Results              | Conditions                                                 | Locations                                                                                                                                                                                                                                                                                    |
|---|------------------------------------------------------------------------------------------------------------------|-------------|------------------------|----------------------|------------------------------------------------------------|----------------------------------------------------------------------------------------------------------------------------------------------------------------------------------------------------------------------------------------------------------------------------------------------|
| 1 | Prophylaxis Roles of IL-2 Treatment on Acute GVHD After Transplantation                                          | NCT02659657 | Recruiting             | No results available | Acute GVHD                                                 | Peking University Institute of Hematology, Beijing, China                                                                                                                                                                                                                                    |
| 2 | Trial of Regulatory T-cells Plus Low-Dose Interleukin-2 for Steroid-Refractory Chronic Graft-versus-Host-Disease | NCT01937468 | Active, not recruiting | No results available | Chronic GVHD; Complications of Organ Transplant Stem Cells | <ul style="list-style-type: none"> <li>Brigham and Women's Hospital<br/>Boston, Massachusetts, United States</li> <li>Dana-Farber Cancer Institute<br/>Boston, Massachusetts, United States</li> </ul>                                                                                       |
| 3 | Ultra-Low Dose Interleukin-2 for Refractory Chronic Graft Versus Host Disease                                    | NCT00529035 | Active, not recruiting | Has results          | GVHD                                                       | <ul style="list-style-type: none"> <li>Dana-Farber Cancer Institute<br/>Boston, Massachusetts, United States</li> </ul>                                                                                                                                                                      |
| 4 | Daily IL-2 for Steroid-Refractory Chronic Graft-versus-Host-Disease                                              | NCT01366092 | Active, not recruiting | Has results          | Chronic GVHD                                               | <ul style="list-style-type: none"> <li>Dana-Farber Cancer Institute<br/>Boston, Massachusetts, United States</li> <li>Massachusetts General Hospital<br/>Boston, Massachusetts, United States</li> <li>Beth Israel Deaconess Medical Center, Boston, Massachusetts, United States</li> </ul> |

|   |                                                                                                                                                                               |             |                        |                      |                                                                                                                                                                               |                                                                                                                                                             |
|---|-------------------------------------------------------------------------------------------------------------------------------------------------------------------------------|-------------|------------------------|----------------------|-------------------------------------------------------------------------------------------------------------------------------------------------------------------------------|-------------------------------------------------------------------------------------------------------------------------------------------------------------|
| 5 | A Phase II Trial of Low-Dose Interleukin-2 (IL-2) Added to Extra-Corporeal Photopheresis for Steroid-Refractory cGVHD                                                         | NCT02340676 | Active, not recruiting | Has results          | Chronic GVHD                                                                                                                                                                  | <ul style="list-style-type: none"> <li>Dana-Farber Cancer Institute<br/>Boston, Massachusetts, United States</li> </ul>                                     |
| 6 | In Vivo Treg Expansion and Graft-versus-Host-Disease Prophylaxis                                                                                                              | NCT01927120 | Completed              | Has results          | GVHD                                                                                                                                                                          | <ul style="list-style-type: none"> <li>H. Lee Moffitt Cancer Center and Research Institute, Tampa, Florida, United States</li> </ul>                        |
| 7 | In-vivo Regulatory T Cell Enhancement With Cyclophosphamide and Sirolimus With or Without Vidaza (Azacitidine) for Steroid-refractory Acute Graft-versus-Host-Disease (T-REG) | NCT01453140 | Completed              | No results available | GVHD                                                                                                                                                                          | <ul style="list-style-type: none"> <li>John Theurer Cancer Center at Hackensack University Medical Center, Hackensack, New Jersey, United States</li> </ul> |
| 8 | Ultra-Low Dose IL-2 Therapy as GVHD Prophylaxis in Haploidentical Allogeneic Stem Cell Transplantation                                                                        | NCT02226861 | Completed              | No results available | <ul style="list-style-type: none"> <li>Acute Lymphoblastic Leukemia (ALL);</li> <li>Acute Myelogenous Leukemia (AML);</li> <li>Chronic Lymphocytic Leukemia (CLL);</li> </ul> | <ul style="list-style-type: none"> <li>National Institutes of Health Clinical Center, 9000 Rockville Pike, Bethesda, Maryland, United States</li> </ul>     |

|    |                                                                                                                               |             |                        |                      |                                                                                                                                                                                                                                                                                                   |                                                                                                                                                                         |
|----|-------------------------------------------------------------------------------------------------------------------------------|-------------|------------------------|----------------------|---------------------------------------------------------------------------------------------------------------------------------------------------------------------------------------------------------------------------------------------------------------------------------------------------|-------------------------------------------------------------------------------------------------------------------------------------------------------------------------|
|    |                                                                                                                               |             |                        |                      | <ul style="list-style-type: none"> <li>Chronic Myelogenous Leukemia (CML);</li> <li>MDS</li> </ul>                                                                                                                                                                                                |                                                                                                                                                                         |
| 9  | <p>Low Dose IL-2, Hematopoietic Stem Cell Transplantation, IL-2 for GVHD (IL-2 for GVHD)</p> <hr/>                            | NCT00539695 | Completed              | Has results          | <ul style="list-style-type: none"> <li>Acute Lymphoblastic Leukemia (ALL);</li> <li>Acute Myelogenous Leukemia (AML);</li> <li>Chronic Myelogenous Leukemia (CML);</li> <li>Myelodysplastic Syndrome;</li> <li>Myeloproliferative Disorder;</li> <li>Hodgkin and Non-Hodgkin Lymphoma;</li> </ul> | <ul style="list-style-type: none"> <li>Texas Children's Hospital Houston, Texas, United States</li> <li>The Methodist Hospital Houston, Texas, United States</li> </ul> |
| 10 | <p>Study of Individual Adult and Pediatric Patient Dose-escalated Interleukin-2 Therapy for Refractory Chronic GVHD</p> <hr/> | NCT02318082 | Active, not recruiting | No results available | Chronic GVHD                                                                                                                                                                                                                                                                                      | <ul style="list-style-type: none"> <li>Dana-Farber Cancer Institute Boston, Massachusetts, United States</li> </ul>                                                     |

|    |                                                                                                           |             |           |                      |               |                                                                                                                                                 |
|----|-----------------------------------------------------------------------------------------------------------|-------------|-----------|----------------------|---------------|-------------------------------------------------------------------------------------------------------------------------------------------------|
| 11 | Graft-versus-Host-Disease in Treating Patients With Recurrent or Refractory Lymphoma or Hodgkin's Disease | NCT00003414 | Completed | No results available | GVHD Lymphoma | <ul style="list-style-type: none"><li>• Sidney Kimmel Comprehensive Cancer Center at Johns Hopkins Baltimore, Maryland, United States</li></ul> |
|----|-----------------------------------------------------------------------------------------------------------|-------------|-----------|----------------------|---------------|-------------------------------------------------------------------------------------------------------------------------------------------------|
