# Supplementary material for: The promise of CD4+FoxP3+ regulatory T-cell manipulation in vivo: applications for allogeneic hematopoietic stem cell transplantation
Source: PubMed Central journal article supplement — Haematologica. 2019 Jun 20;104(7):1309–21. doi: 10.3324/haematol.2018.198838 (PMC6601084; doi:10.3324/haematol.2018.198838), 2019-07
Supplement: 2018_198838-Disclosures_and_Contributions.pdf [file 2018_198838-Disclosures_and_Contributions.pdf]

Haematologica  
HAEMATOL/2018/198838  
Version 3

The promise of CD4+FoxP3+ regulatory T cell manipulation in vivo:  
applications for allogeneic hematopoietic stem cell transplantation

Sabrina Copsel, Dietlinde Wolf, Krishna V. Komanduri, and Robert B.  
Levy

Disclosures: RBL is a scientific advisory board member of Heat Biologics and a consultant for Heat Biologics and Pelican Therapeutics. KVK has served as an ad hoc consultant to Kite/Gilead, Novartis, Celgene, Sanofi Genzyme, Malinckrodt, Kirin Kyowa Pharmaceuticals, Incyte and Regimmune. He has no permanent advisory roles nor equity positions relevant to this review.

Contributions: SC and DW equally contributed to the preparation of the manuscript. KK critiqued the manuscript and RBL helped write and edit the manuscript.
